# Supplementary material
Source: PubMed Central journal article supplement (PMC7202220)
Supplement: EMBR-21-e49890-s001.pdf [file EMBR-21-e49890-s001.pdf]

## Table of contents

|                                                                                                                                            |    |
|--------------------------------------------------------------------------------------------------------------------------------------------|----|
| Appendix Figure S1 .....                                                                                                                   | 2  |
| Appendix Figure S2 .....                                                                                                                   | 4  |
| Appendix Figure S3 .....                                                                                                                   | 5  |
| Appendix Figure S4 .....                                                                                                                   | 6  |
| Appendix Figure S5.....                                                                                                                    | 7  |
| <br>                                                                                                                                       |    |
| Appendix Table S1: Comparison of tRIP protocol with CLIP protocols .....                                                                   | 9  |
| Appendix Table S2. Gene Ontology analysis using the GOrilla database .....                                                                 | 10 |
| Appendix Table S3. The amount of materials used for construction of each tRIP library.....                                                 | 11 |
| Appendix Table S4. Accession numbers in the DDBJ sequence read archive and figure numbers of the high-throughput sequencing analysis ..... | 12 |
| Appendix Table S5. Antibodies employed in the study .....                                                                                  | 13 |
| <br>                                                                                                                                       |    |
| Appendix References .....                                                                                                                  | 14 |

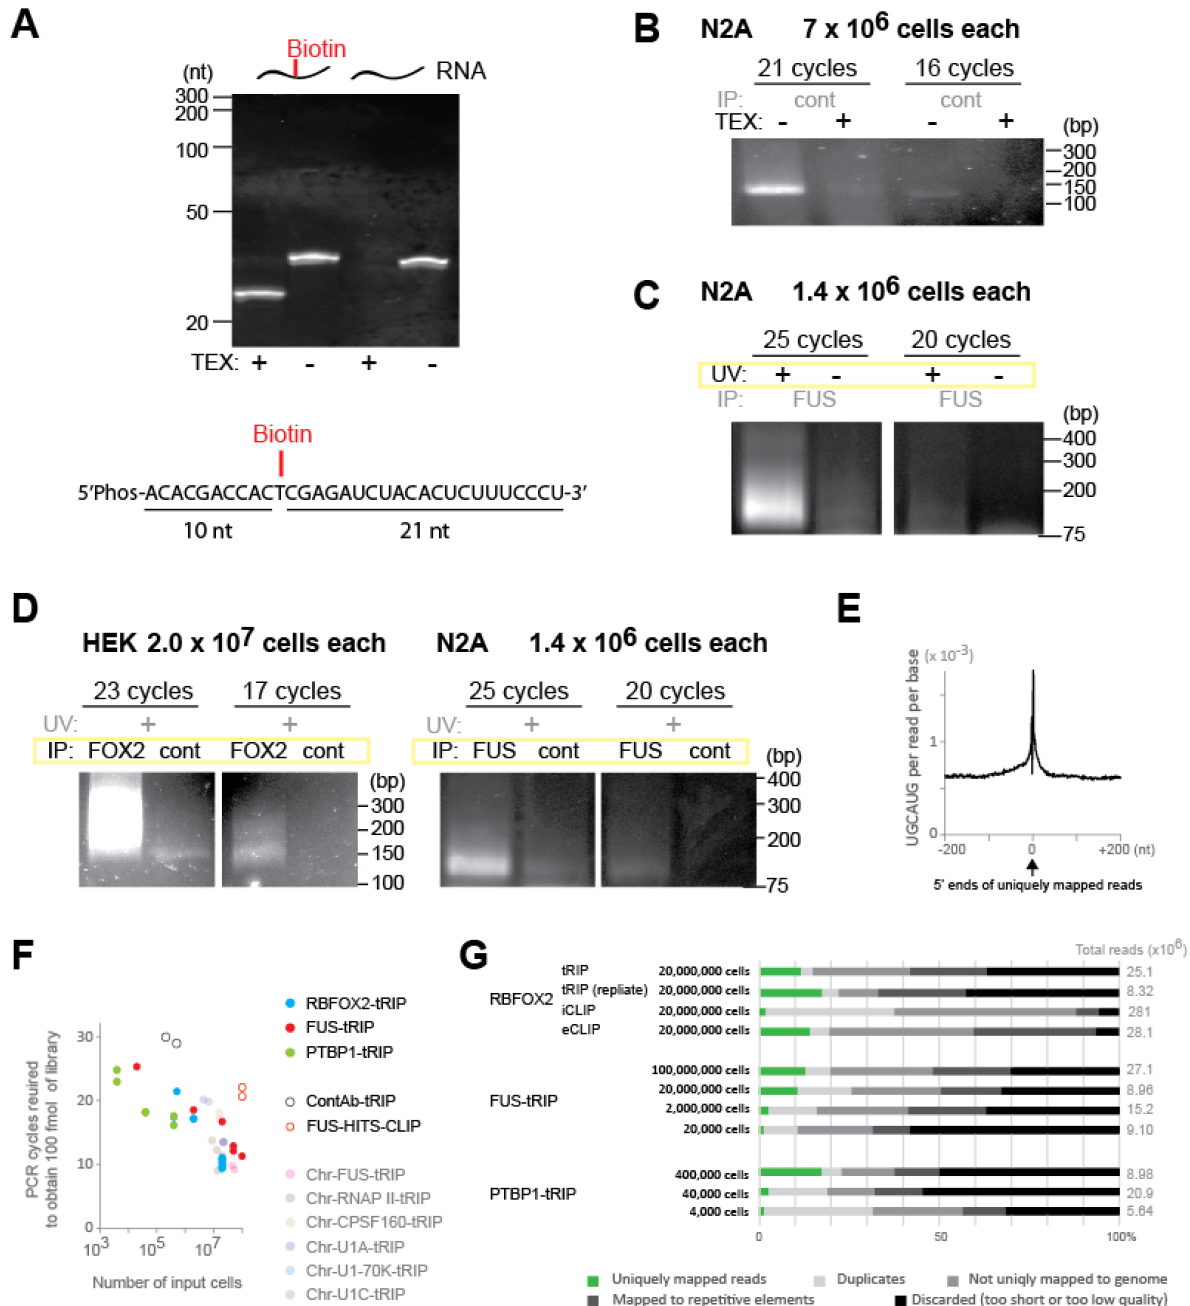

**Appendix Figure S1.**

**A.** *In vitro* prevention of TEX-dependent digestion of an RNA/DNA hybrid probe by attachment of biotin in the middle of the probe. The 32 nt single stranded RNA/DNA hybrid probe (2.5  $\mu$ g) with or without biotin at the middle T nucleotide (bottom scheme) was incubated with 0.5 unit of TEX (+) or not (-) in  $1 \times$  TEX reaction buffer A (Epicentre) for 1 hr at 30°C. Then the samples were mixed with loading buffer, incubated for 3 min at 80°C, and analyzed on the polyacrylamide gel. The sequence of the probe and the position of the biotinylated nucleotide are shown at the bottom.

**B.** Removal of free linkers by TEX treatment. tRIP libraries are constructed from  $7 \times 10^6$  N2A cells using mouse control IgG (cont) with TEX treatment (+) or not (-). The tRIP libraries are PCR-amplified with indicated numbers of cycles, and analyzed on a 4% NuSieve agarose gel. Note that the band arising from free linkers (126 bp) is eliminated by TEX treatment.

**C.** UV-crosslinking-dependent generation of tRIP libraries. tRIPs of FUS are performed using N2A cells with UV-crosslinking (+) or not (-). The tRIP libraries are PCR-amplified with indicated numbers of cycles, and analyzed on 4% NuSieve agarose gels.

**D.** Immunoprecipitation-dependent generation of tRIP libraries. Indicated numbers of HEK and N2A cells are UV-crosslinked, and tRIP experiments are performed using anti-RBFOX2 (FOX2), anti-FUS (FUS), or control antibody (cont). The tRIP libraries are PCR-amplified with indicated numbers of cycles, and analyzed on 4% NuSieve agarose gels.

**E.** The enrichment of RBFOX2 motif (UGCAUG) at each position around the 5' end of RBFOX2-tRIP reads.

**F.** The number of PCR cycles required to obtain 100 fmol of the indicated tRIP library, extrapolated from the final amount of tRIP library and the number of PCR cycles, assuming doubling at each cycle.

**G.** Mapping efficiencies of reads of tRIP-seqs, RBFOX2-iCLIP (GSM2055496), and RBFOX2-eCLIP (GSM2055434). The tRIP-, iCLIP-, and eCLIP-reads were mapped to the genome using the same pipeline.

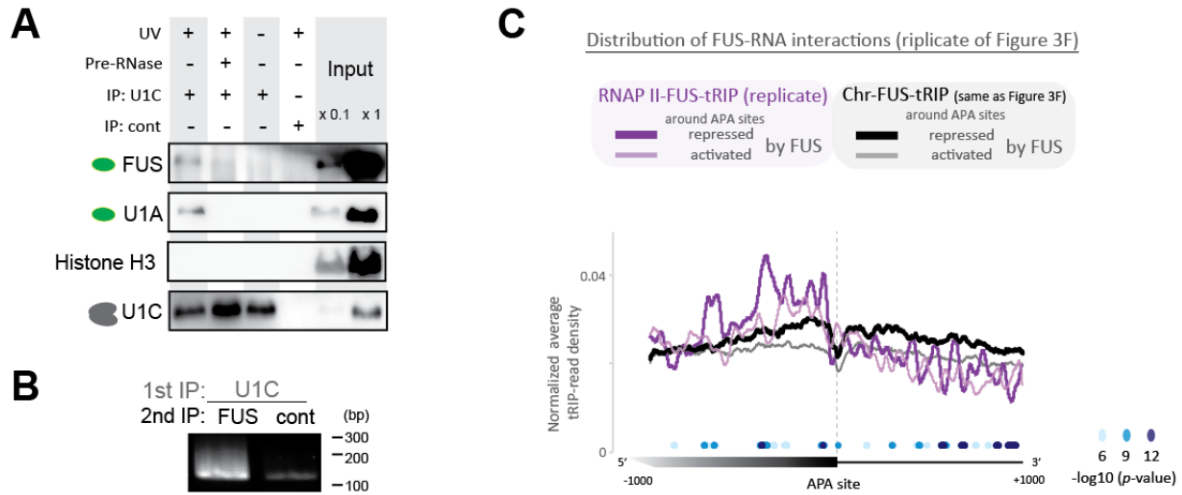

### Appendix Figure S2.

**A.** U1 snRNP-RBP-RNA complex was immunoprecipitated by anti-U1C antibody or control antibody (cont), and subjected to immunoblotting. The input lanes contained 0.4% ( $\times 1$ ) or 0.04% ( $\times 0.1$ ) of lysates used in the immunoprecipitation experiments.

**B.** Generation of tRIP libraries of U1 snRNP-RBP-RNA complexes. U1C-specific antibody was used for the 1st immunoprecipitation, instead of RNAPII-specific antibody in the tRIP of RNAPII-RBP-RNA complexes (Fig 2C). The panels show PCR-amplification of tRIP libraries generated from U1 snRNP-RBP-RNA complex.

**C.** Read distributions of a biological replicate of RNAP II-FUS-tRIP shown in Fig 2E (purple lines) around APA sites repressed (bold lines) or activated (thin lines) by FUS. Black lines show read distributions of Chr-FUS-tRIP (same as Fig 2E). The  $p$ -values for the differences between RNAP II-FUS-tRIP and Chr-FUS-tRIP around FUS-repressed APA sites are indicated by circles.

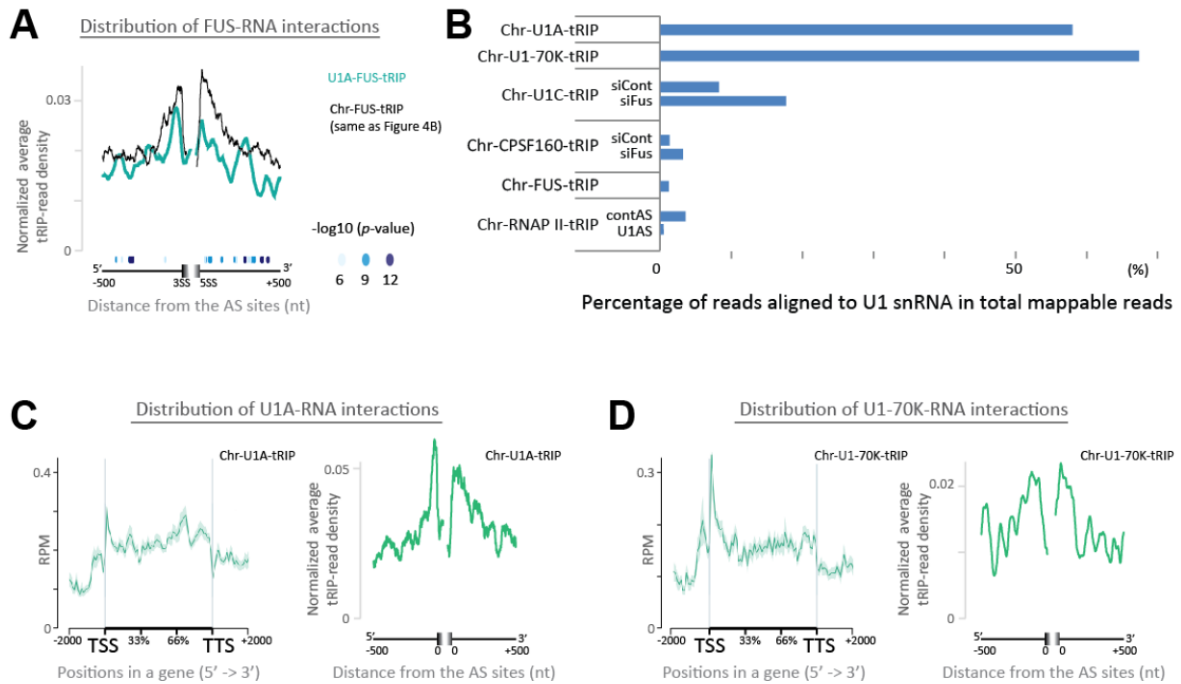

### Appendix Figure S3.

**A.** Read distributions of U1A-FUS-tRIP (blue lines) around AS sites. Black lines show read distributions of Chr-FUS-tRIP (same as Fig 3A). The  $p$ -values for the differences between U1A-FUS-tRIP and Chr-FUS-tRIP are indicated by circles.

**B.** Ratios of reads aligned to U1 snRNA in total mappable reads of Chr-U1A-tRIP, Chr-U1-70K-tRIP, Chr-U1C-tRIP, Chr-CPSF160-tRIP, Chr-FUS-tRIP, and Chr-RNAP II-tRIP. Note that large fractions of U1A and U1-70K bind to U1 snRNA, whereas U1C bind to U1 snRNA to a less extent. This is likely because parallel binding of U1C to the 5' splice sites decreases the number of Chr-U1C-tRIP reads mapped to U1 snRNA.

**C and D.** Read distributions of Chr-U1A-tRIP (C) and Chr-U1-70K-tRIP (D). The left graphs show read distributions of tRIP-seqs mapped to the relative positions of all mouse coding genes. The ngs.plot tool [1] was used to plot average RPM on a gene structure. The standard error of mean RPM is shown as a semi-transparent shade around the average curve. The right graphs show read distributions of tRIP-seqs around AS sites.

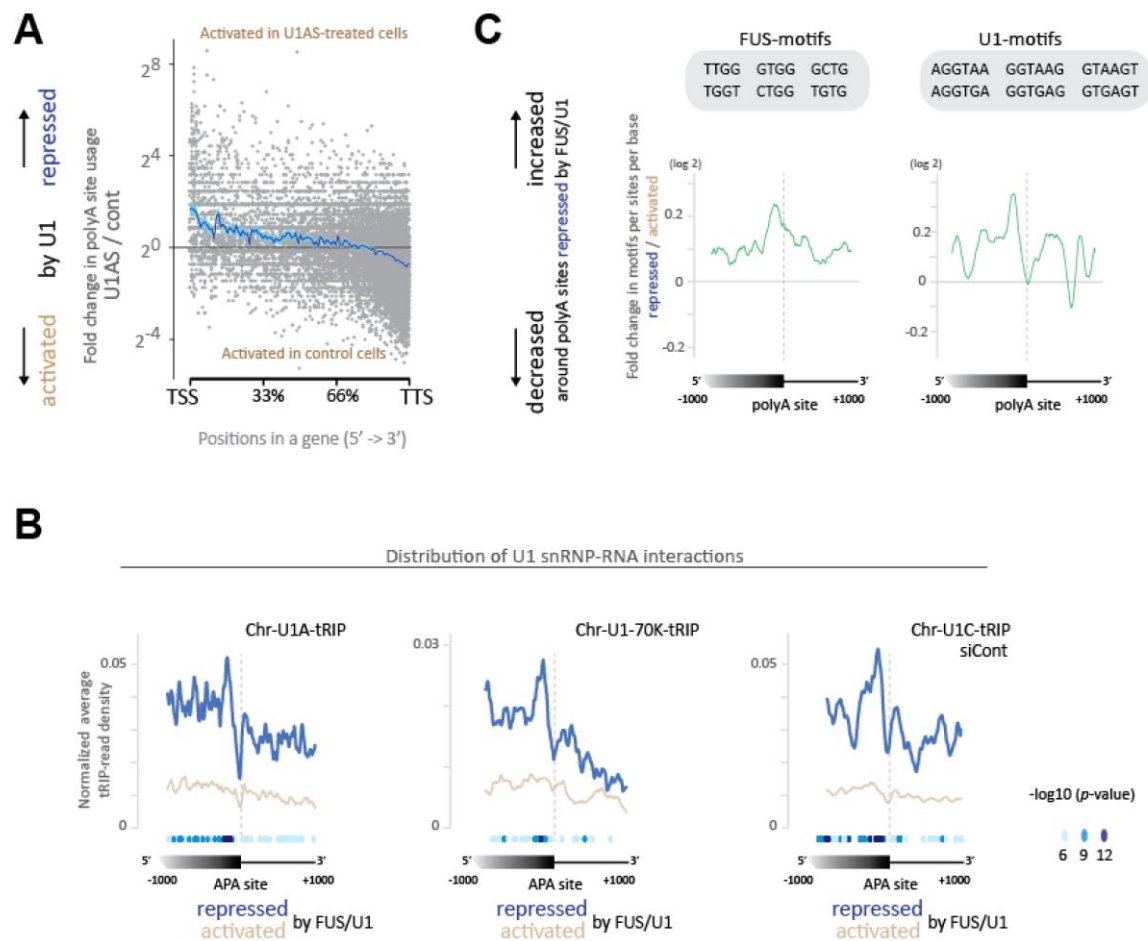

#### Appendix Figure S4.

**A.** Change in polyA site usage by U1-inhibition. Each point indicates fold change of RPM of a polyA site by U1-inhibition (U1AS/cont) on the relative positions of all mouse coding genes. The average is shown in blue line. The standard error of the mean is shown in semi-transparent blue shade.

**B.** Read distributions of Chr-U1A-tRIP, Chr-U1-70K-tRIP and Chr-U1C-tRIP around APA sites repressed or activated by FUS/U1. The *p*-values for the differences between repressed and activated APA sites are indicated by circles.

**C.** Enrichments of FUS and U1 snRNP-recognition motifs upstream to the FUS/U1 snRNP-repressed polyA sites (the first quadrant in Fig 4A). The analyzed motifs are shown at the top. FUS-motifs are according to our previous report [2]. U1-motifs are parts of the consensus sequence of the 5' splice site, AGGTRAGT. The frequency of repressed APA sites was divided by that of activated sites at each nucleotide position, and is plotted on the graph.

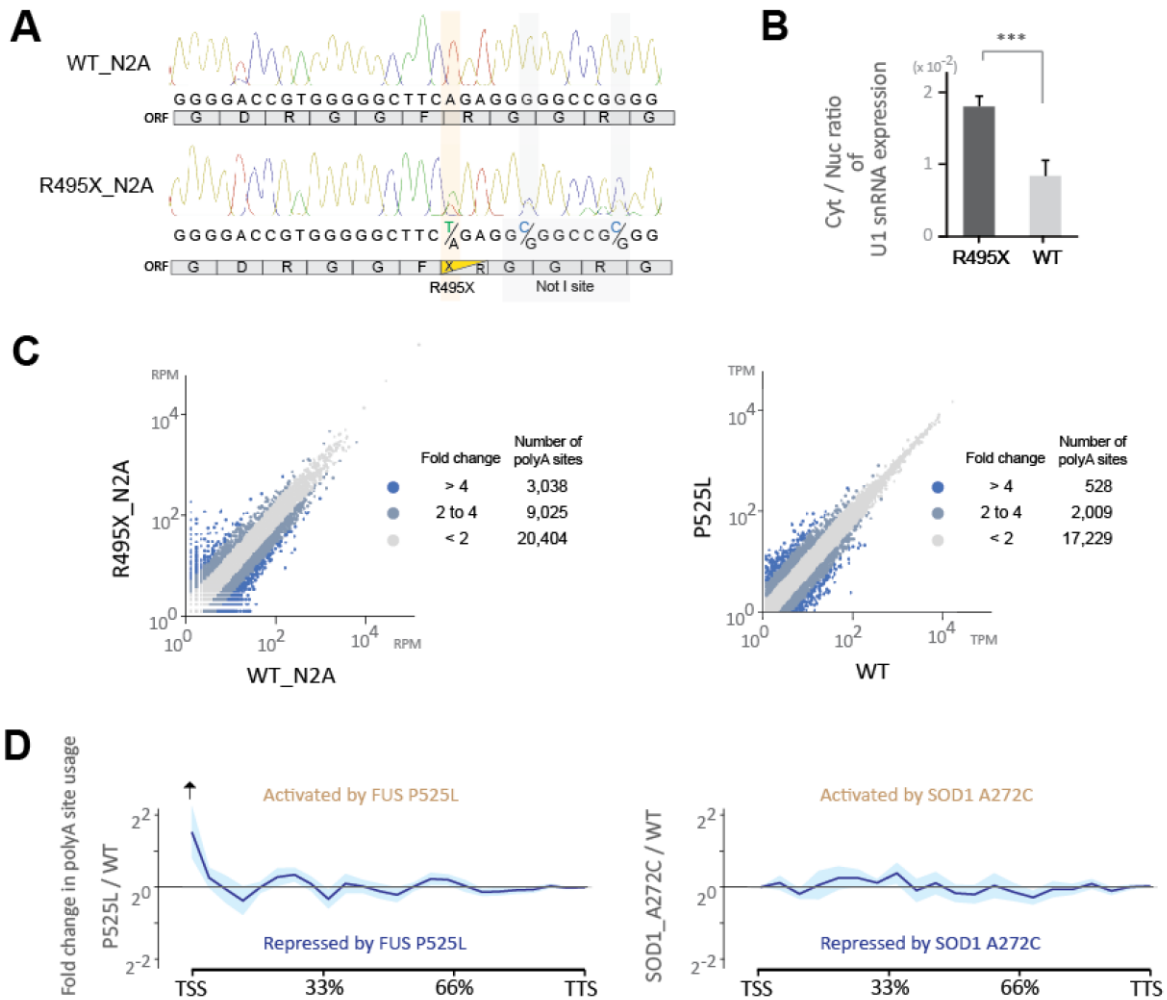

## Appendix Figure S5.

**A.** Sanger sequencing analysis showing the introduction of the heteroallelic mutation corresponding to the human FUS mutation, R495X, into mouse N2A cells (R495X\_N2A). The sequence of the parental N2A cells (WT\_N2A) is shown above. Two synonymous mutations were also introduced to avoid repeated cutting by the CRISPR-Cas9 and to add a restriction enzyme recognition site for Not I.

**B.** Distribution of U1 snRNA in R495X\_N2A (R495X) and WT\_N2A (WT) cells. Cytoplasmic and nuclear lysates were harvested as described elsewhere [3], and total RNA was extracted from the lysates with TRIZOL (ThermoFisher) according to the manufacturer's instruction. Real-time RT-PCR was performed to quantify U1 snRNA and 5S RNA using the following primers, U1/F; 5'-GATACCATGATCATGAAGGTGGTT-3', U1/R; 5'-CACAAATTTGCATCGAGTTTCC-3', 5S/F; 5'-CGGCCATACCACCCTGAAC-3', and 5S/R; 5'-GCGGTCTCCCATCCAAGTAC-3'. Expression level of U1 snRNA was normalized to that of 5S RNA, and nuclear/cytoplasm ratio of

the normalized U1 snRNA-expression level was calculated. Mean and SD are shown. \*\*\* $p < 0.001$  by Student's *t*-test.

**C.** Scatter plots showing correlation of polyA site usage between cells bearing the indicated FUS mutation (R495X or P525L) and wild-type control cells (WT). The RPM or transcripts per million (TPM) of a polyA site in FUS-mutated cells was plotted against that in control cells.

**D.** Change in polyA site usage by the P525L FUS mutation. Fold change of polyA site usage by the FUS P525L mutation (left panel, FUS-P525L/WT) or the SOD1 A272C mutation (right panel, SOD1-A272C/WT) on the relative positions of all mouse coding genes is plotted. To avoid division by zero, which occurs in the calculation of the sites not detected in control cells, 0.1 was added to all TPM values. The average is shown in blue line. The standard error of the mean is shown in semi-transparent blue shade.



**Appendix Table S1: Comparison of tRIP protocol with CLIP protocols**

|                                    |      | tRIP                            |      | eCLIP [5]                 |      | HITS-CLIP [6]      |      | iCLIP [7]               |                    |
|------------------------------------|------|---------------------------------|------|---------------------------|------|--------------------|------|-------------------------|--------------------|
| <b>Application</b>                 |      |                                 |      |                           |      |                    |      |                         |                    |
| RNA-protein interaction            |      | ✓                               |      | ✓                         |      | ✓                  |      | ✓                       |                    |
| RNA-modification                   |      | ✓                               |      |                           |      |                    |      |                         |                    |
| <b>Protocol</b>                    |      |                                 |      |                           |      |                    |      |                         |                    |
| UV crosslinking                    | Day1 | Depending on the analysis       | Day1 | ✓                         | Day1 | ✓                  | Day1 | ✓                       |                    |
| Cell lysis                         |      | ✓                               |      | ✓                         |      | ✓                  |      | ✓                       |                    |
| RNase treatment                    |      | on beads                        |      | Total cell lysates        |      | Total cell lysates |      | Total cell lysates      |                    |
| IP                                 |      | ✓                               |      | ✓                         |      | ✓                  |      | ✓                       |                    |
| Dephosphorylation of RNA           |      |                                 |      | ✓                         |      | ✓                  |      | ✓                       |                    |
| 5' end labeling                    |      |                                 |      | ✓                         |      | ✓                  |      | ✓                       |                    |
| 3' linker ligation                 |      | ✓                               |      | ✓                         | Day2 | ✓                  | Day2 | ✓                       |                    |
| SDS-PAGE                           | Day2 | Deadenylase- and TEX-treatments |      | ✓                         |      | ✓                  |      | ✓                       |                    |
| Transfer to membranes              |      |                                 |      | ✓                         |      | ✓                  |      | ✓                       |                    |
| Cut membrane                       |      |                                 | Day2 | ✓                         |      | ✓                  |      | ✓                       |                    |
| Proteinase K treatment             |      | ✓                               |      | ✓                         |      | ✓                  |      | ✓                       |                    |
| Purification of RNA                |      |                                 |      | Phenol /chloroform        |      | Phenol /chloroform |      | Phenol /chloroform      |                    |
|                                    |      | Column purification             |      | Column purification       |      | ETOH precipitation |      | ETOH precipitation      |                    |
| Reverse transcription              |      | ✓                               | Day3 | ✓                         | Day4 | ✓                  | Day3 | ✓                       |                    |
| Purification of cDNA/RNA           |      |                                 |      | Silane-beads purification | Day3 | Phenol /chloroform |      | Phenol /chloroform      | ETOH precipitation |
| Modification of 5' end             |      | PolyA tailing                   |      | 5' linker ligation        |      | 5' linker ligation | Day5 | Circularization of cDNA | ETOH precipitation |
| Purification of cDNA/RNA           |      |                                 | Day4 | Silane-beads purification |      | ETOH precipitation | Day4 | Gel purification        | ETOH precipitation |
| PCR amplification and purification |      | ✓                               |      | ✓                         | Day4 | ✓                  | Day6 | ✓                       |                    |
| Hands-on time                      |      | 2 days                          |      | 4 days                    |      | 4 days             |      | 6 days                  |                    |

An oblique line indicates that there is no corresponding experimental step.

**Appendix Table S2. Gene Ontology analysis using the GOrilla database.**

| <b>GO ID</b> | <b>GOTERM_BP5</b>                | <b><i>p</i>-value</b> |
|--------------|----------------------------------|-----------------------|
| GO:0023061   | signal release                   | 4.28E-07              |
| GO:0099643   | signal release from synapse*     | 1.21E-06              |
| GO:0032502   | developmental process            | 1.26E-06              |
| GO:0007269   | neurotransmitter secretion*      | 2.59E-06              |
| GO:0032940   | secretion by cell                | 8.58E-06              |
| GO:0046903   | secretion                        | 8.88E-06              |
| GO:0006836   | neurotransmitter transport*      | 1.50E-05              |
| GO:0032501   | multicellular organismal process | 1.76E-05              |
| GO:0017156   | calcium ion regulated exocytosis | 3.73E-05              |
| GO:0048856   | anatomical structure development | 5.74E-05              |

Two thousand ninety-four genes, which harbor polyA sites affected more than 4-fold in R495X\_N2A cells, are analyzed using the “Process” dataset with GOrilla [4]. For background, 8,924 genes, which harbor polyA sites detected in both polyA-seq of R495X\_N2A and that of WT\_N2A (RPM > 1), are used.

GO terms with the ten best *p*-values are indicated.

\*GO terms with neuron-specific functionalities.

**Appendix Table S3: The amount of materials used for construction of each tRIP library**

| Library             | Cells   | Fraction  | Cell number<br>(million cells) | DNase I<br>( $\mu$ l) | **Benzonase<br>(unit) | 1st<br>antibody<br>( $\mu$ g) | 2nd<br>antibody<br>( $\mu$ g) | Protein G<br>beads<br>( $\mu$ l) | RNase III<br>(unit) |
|---------------------|---------|-----------|--------------------------------|-----------------------|-----------------------|-------------------------------|-------------------------------|----------------------------------|---------------------|
| RBFOX2              | HEK293T | Whole     | 20                             | 30                    | 10                    | 10                            | -                             | 100                              | 2                   |
|                     |         |           | 100                            | 60                    | 0.025                 | 10                            | -                             | 100                              | 1                   |
| FUS                 | N2A     | Whole     | 20                             | 60                    | 0                     | 10                            | -                             | 100                              | 0.4                 |
|                     |         |           | 2                              | 10                    | 0                     | 2                             | -                             | 10                               | 0.2                 |
|                     |         |           | 0.02                           | 0.5                   | 0                     | 0.2                           | -                             | 4                                | 0.002               |
| ContAb              | N2A     | Whole     | 0.2                            | 10                    | 0                     | 0.5                           | -                             | 5                                | 0.025               |
|                     |         |           | 0.4                            | 5                     | 0.25                  | 2                             | -                             | 20                               | 0.2                 |
| PTBP1               | C2C12   | Whole     | 0.04                           | 0.5                   | 0.025                 | 0.2                           | -                             | 2                                | 0.01                |
|                     |         |           | 0.004                          | 0.05                  | 0.0025                | 0.4                           | -                             | 4                                | 0.002               |
|                     |         |           |                                |                       |                       |                               |                               |                                  |                     |
| Chr-FUS             | N2A     | Chromatin | 45                             | 60                    | 0.25                  | 10                            | -                             | 100                              | 4                   |
| Chr-CPSF160         | N2A     | Chromatin | 16                             | 20                    | 0                     | 5                             | -                             | 50                               | 4                   |
| Chr-U1-70K          | N2A     | Chromatin | 22                             | 30                    | 0                     | 2                             | -                             | 20                               | 1**                 |
| Chr-U1C             | N2A     | Chromatin | 23                             | 60                    | 0                     | 10                            | -                             | 100                              | 2**                 |
| U1C-FUS             | ↓       | ↓         | ↓                              | ↓                     | ↓                     | ↓                             | 0.4                           | 4                                | ↓                   |
| Chr-U1A             | N2A     | Chromatin | 23                             | 60                    | 0                     | 10                            | -                             | 100                              | 2**                 |
| U1A-FUS             | ↓       | ↓         | ↓                              | ↓                     | ↓                     | ↓                             | 0.4                           | 4                                | ↓                   |
| Chr-RNAP II         | N2A     | Chromatin | 18                             | 30                    | 0                     | 5                             | -                             | 50                               | 1                   |
| RNAP II-FUS         | ↓       | ↓         | ↓                              | ↓                     | ↓                     | ↓                             | 0.5                           | 5                                | ↓                   |
| RNAP II-U1C         | ↓       | ↓         | ↓                              | ↓                     | ↓                     | ↓                             | 0.4                           | 4                                | ↓                   |
| RNAP II-<br>CPSF160 | ↓       | ↓         | ↓                              | ↓                     | ↓                     | ↓                             | 0.4                           | 4                                | ↓                   |

\* Total cell lysates were treated with Benzonase (Merck Millipore) for 5 min at 37°C to promote the fragmentation of RNA, following the DNase I treatment, when large amounts of RNA-protein complexes were harvested. The treatment yielded RNA fragments in ~500-to-thousands-nt length.

\*\*Incubation at 37°C for 20 min.

**Appendix Table S4. Accession numbers in the DDBJ sequence read archive and figure numbers of the high-throughput sequencing analysis**

| Analysis           | Cell number<br>(million cells) | Treatment                                                     | Cell<br>fraction | 1st<br>antibody | 2nd<br>antibody | Accession<br>number | Figure number           |
|--------------------|--------------------------------|---------------------------------------------------------------|------------------|-----------------|-----------------|---------------------|-------------------------|
| RBFOX2             | 20                             | -                                                             | Whole            | RBFOX2          | -               | DRA008138           | Figs 1BDF, S1EG         |
| RBFOX2 (replicate) | 20                             | -                                                             | Whole            | RBFOX2          | -               | DRA005742           | Fig S1G                 |
| FUS                | 100                            | -                                                             | Whole            | FUS             | -               | DRA008251           | Fig 1CEGH               |
| FUS                | 20, 2, 0.02                    | -                                                             | Whole            | FUS             | -               | DRA008141           | Fig 1CGH                |
| ContAb             | 0.2                            | -                                                             | Whole            | Control         | -               | DRA008252           | Fig 1C                  |
| PTBP1              | 0.4, 0.04, 0.004               | -                                                             | Whole            | PTBP1           | -               | DRA005743           | Figs EV2CD, S1G         |
| m6A                | 0.4, 0.04, 0.004               | -                                                             | Whole            | m6A             | -               | DRA005746           | Figs EV2ABCE            |
| Chr-FUS            | 45                             | -                                                             | Chromatin        | FUS             | -               | DRA008141           | Figs 2DE, 3AB, S2C, S3A |
| Chr-CPSF160        | 16                             | -                                                             | Chromatin        | CPSF160         | -               | DRA008137           | Fig EV3C                |
| Chr-RNAP II        | 18                             | siCont, siFus                                                 | Chromatin        | RNAPII          | -               | DRA008140           | Fig EV3AB               |
| Chr-U1-70K         | 22                             | -                                                             | Chromatin        | U1-70K          | -               | DRA008142           | Figs S3D, S4B           |
| Chr-U1A            | 23                             | -                                                             | Chromatin        | U1A             | -               | DRA008142           | Figs S3C, S4B           |
| Chr-U1C            | 23                             | siCont, siFus                                                 | Chromatin        | U1C             | -               | DRA008142           | Figs 3C, S4B            |
| RNAP II-CPSF160    | 18                             | siCont, siFus                                                 | Chromatin        | RNAPII          | CPSF160         | DRA008137           | Figs 2F, EV3B           |
| RNAP II-FUS        | 18                             | -                                                             | Chromatin        | RNAPII          | FUS             | DRA005757           | Figs 2DE, 3B, EV3B, S2C |
| RNAP II-FUS        | 18                             | contAS, U1AS                                                  | Chromatin        | RNAPII          | FUS             | DRA008140           | Fig 4CD                 |
| RNAP II-U1C        | 18                             | siCont, siFus                                                 | Chromatin        | RNAPII          | U1C             | DRA008142           | Figs 3D, 4CD            |
| U1A-FUS            | 23                             | -                                                             | Chromatin        | U1A             | FUS             | DRA008142           | Figs 4E, S3A            |
| U1C-FUS            | 23                             | -                                                             | Chromatin        | U1C             | FUS             | DRA008142           | Figs 2D, 3B, 4E         |
| PolyA-seq          | 1.4                            | siCont+ContAS,<br>siCont+U1AS,<br>siFus+contAS,<br>siFus+U1AS | Whole            | -               | -               | DRA008136           | Fig 4AB                 |
| PolyA-seq          | 2                              | R495X, WT                                                     | Whole            |                 |                 | DRA009662           | Fig 6CD                 |

**Appendix Table S5. Antibodies employed in the study**

|                                                 |                           |                                    |
|-------------------------------------------------|---------------------------|------------------------------------|
| Mouse monoclonal anti-CPSF160 (G-10)            | Santa Cruz Biotechnology  | Cat# sc-166281,<br>RRID:AB_2084362 |
| Mouse monoclonal anti-FUS (4H11)                | Santa Cruz Biotechnology  | Cat# sc-47711,<br>RRID:AB_2105208  |
| Rabbit polyclonal anti-FUS                      | Abcam                     | Cat# ab84078<br>RRID: AB_2105201   |
| Rabbit polyclonal anti-N6-methyladenosine (m6A) | Abcam                     | Cat# ab151230,<br>RRID:AB_2753144  |
| Goat polyclonal anti-PTBP1 (N-20)               | Santa Cruz Biotechnology  | Cat# sc-16547,<br>RRID:AB_2253470  |
| Rabbit polyclonal anti-RBFOX2                   | Bethyl Laboratories       | Cat# A300-864A,<br>RRID:AB_609476  |
| Rabbit polyclonal anti-RNAP II (N-20)           | Santa Cruz Biotechnology  | Cat# sc-899,<br>RRID:AB_632359     |
| Mouse monoclonal anti-Rpb1 CTD (4H8)            | Cell Signaling Technology | Cat# 2629,<br>RRID:AB_2167468      |
| Rabbit polyclonal anti-SNRPA (U1A)              | Thermo Fisher Scientific  | Cat# PA5-27474,<br>RRID:AB_2544950 |
| Rat monoclonal anti-U1 snRNP C (U1C) (4H12)     | Bio Academia              | Cat# 70-400,<br>RRID:AB_10550948   |
| Mouse monoclonal anti-U1-70k (H111)             | Synaptic Systems          | Cat# 203 011,<br>RRID:AB_887903    |
| Normal mouse IgG antibody                       | Santa Cruz Biotechnology  | Cat# sc-2025,<br>RRID:AB_737182    |
| Normal rabbit IgG antibody                      | Santa Cruz Biotechnology  | Cat# sc-2027,<br>RRID:AB_737197    |
| Mouse monoclonal anti-CPSF160 (G-10)            | Santa Cruz Biotechnology  | Cat# sc-166281,<br>RRID:AB_2084362 |
| Mouse monoclonal anti-FUS (4H11)                | Santa Cruz Biotechnology  | Cat# sc-47711,<br>RRID:AB_2105208  |
| Rabbit polyclonal anti-FUS                      | Abcam                     | Cat# ab84078<br>RRID: AB_2105201   |
| Rabbit polyclonal anti-N6-methyladenosine (m6A) | Abcam                     | Cat# ab151230,<br>RRID:AB_2753144  |
| Goat polyclonal anti-PTBP1 (N-20)               | Santa Cruz Biotechnology  | Cat# sc-16547,<br>RRID:AB_2253470  |
| Rabbit polyclonal anti-RBFOX2                   | Bethyl Laboratories       | Cat# A300-864A,<br>RRID:AB_609476  |
| Rabbit polyclonal anti-RNAP II (N-20)           | Santa Cruz Biotechnology  | Cat# sc-899,<br>RRID:AB_632359     |
| Mouse monoclonal anti-Rpb1 CTD (4H8)            | Cell Signaling Technology | Cat# 2629,<br>RRID:AB_2167468      |
| Rabbit polyclonal anti-SNRPA (U1A)              | Thermo Fisher Scientific  | Cat# PA5-27474,<br>RRID:AB_2544950 |
| Rat monoclonal anti-U1 snRNP C (U1C) (4H12)     | Bio Academia              | Cat# 70-400,<br>RRID:AB_10550948   |
| Mouse monoclonal anti-U1-70k (H111)             | Synaptic Systems          | Cat# 203 011,<br>RRID:AB_887903    |
| Normal mouse IgG antibody                       | Santa Cruz Biotechnology  | Cat# sc-2025,<br>RRID:AB_737182    |
| Normal rabbit IgG antibody                      | Santa Cruz Biotechnology  | Cat# sc-2027,<br>RRID:AB_737197    |

## Appendix References

1. Shen L, Shao N, Liu X, Nestler E (2014) ngs.plot: Quick mining and visualization of next-generation sequencing data by integrating genomic databases. *BMC Genomics* **15**: 284
2. Takeda JI, Masuda A, Ohno K (2017) Six GU-rich (6GUR) FUS-binding motifs detected by normalization of CLIP-seq by Nascent-seq. *Gene* **618**: 57-64
3. Masuda A, Andersen HS, Doktor TK, Okamoto T, Ito M, Andresen BS, Ohno K (2012) CUGBP1 and MBNL1 preferentially bind to 3' UTRs and facilitate mRNA decay. *Sci Rep* **2**: 209
4. Eden E, Navon R, Steinfeld I, Lipson D, Yakhini Z (2009) GOrilla: a tool for discovery and visualization of enriched GO terms in ranked gene lists. *BMC Bioinformatics* **10**: 48
5. Van Nostrand EL, Pratt GA, Shishkin AA, Gelboin-Burkhart C, Fang MY, Sundararaman B, Blue SM, Nguyen TB, Surka C, Elkins K, *et al.* (2016) Robust transcriptome-wide discovery of RNA-binding protein binding sites with enhanced CLIP (eCLIP). *Nat Methods* **13**: 508-14
6. Wang Z, Tollervey J, Briese M, Turner D, Ule J (2009) CLIP: construction of cDNA libraries for high-throughput sequencing from RNAs cross-linked to proteins in vivo. *Methods* **48**: 287-93
7. Huppertz I, Attig J, D'Ambrogio A, Easton LE, Sibley CR, Sugimoto Y, Tajnik M, Konig J, Ule J (2014) iCLIP: protein-RNA interactions at nucleotide resolution. *Methods* **65**: 274-87
